# Supplementary material
Source: PubMed Central journal article supplement (PMC5477772)
Supplement: NIHMS844906-supplement-Supp_Tbl_1.pdf [file NIHMS844906-supplement-Supp_Tbl_1.pdf]

Supplemental Table 1. Characteristics of cohorts contributing to discovery, replication, or fracture look-up analyses

| Cohort                                                               | Country         | Full cohort<br>N                           | Female<br>% | Age (years)<br>Mean (SD) | Weight (kg)<br>Mean (SD) | Height (cm)<br>Mean (SD) | Trabecular BMD (g/cm <sup>3</sup> ) |               | Integral BMD (g/cm <sup>3</sup> ) |               | Vertebral level | QCT Instrument                                                                                                                                                                                                                                                                                                                                                                       | Image analysis                                            |  |
|----------------------------------------------------------------------|-----------------|--------------------------------------------|-------------|--------------------------|--------------------------|--------------------------|-------------------------------------|---------------|-----------------------------------|---------------|-----------------|--------------------------------------------------------------------------------------------------------------------------------------------------------------------------------------------------------------------------------------------------------------------------------------------------------------------------------------------------------------------------------------|-----------------------------------------------------------|--|
|                                                                      |                 |                                            |             |                          |                          |                          | N                                   | Mean (SD)     | N                                 | Mean (SD)     |                 |                                                                                                                                                                                                                                                                                                                                                                                      |                                                           |  |
| <b>Discovery cohorts</b>                                             |                 |                                            |             |                          |                          |                          |                                     |               |                                   |               |                 |                                                                                                                                                                                                                                                                                                                                                                                      |                                                           |  |
| Age Gene/Environment Susceptibility-Reykjavik Study (AGES-Reykjavik) | Iceland         | 5764                                       | 58          | 76.4 (5.4)               | 75.8 (14.3)              | 167 (9)                  | 2859                                | 0.075 (0.037) | 2861                              | 0.114 (0.040) | L2              | E Prospeed (Birmingham), GE Hispeed Advantage (Minneapolis), Phillips MX-8000 (Palo Alto), Seimans Somatom +4 (Pittsburgh), Phillips CT-Twin (April-July, 2000, 190 participants) and Toshiba Aquilion (December 2000-March 2002, 467 participants) (Portland), and Picker PQ-5000 (San Diego). All scans were transferred to UCSF for central quality review and image processing.  | T. Lang                                                   |  |
| Family Heart Study                                                   | USA             | 2618                                       | 55          | 57.6 (13.2)              | 82.2 (18.5)              | 168.5 (9.7)              | 2600                                | 0.118 (0.034) | 2570                              | 0.151 (0.038) | L3              | GE LightSpeed Plus (NC), Siemens Volume Zoom (MN), Marconi MX 8000 (UT), GE LightSpeed (AL)                                                                                                                                                                                                                                                                                          | T. Lang                                                   |  |
| Framingham Osteoporosis Study                                        | USA             | 2703                                       | 46          | 52.8 (12.3)              | 81.1 (17.9)              | 170.3 (9.6)              | 2703                                | 0.142 (0.043) | 2686                              | 0.188 (0.041) | L3              | QCT images were originally acquired from participants for assessment of coronary and aortic calcium using an eight-slice multidetector CT (Lightspeed Ultra, GE, Milwaukee, WI, USA).                                                                                                                                                                                                | T. Lang                                                   |  |
| Health, Aging, and Body Composition (Health ABC)                     | USA             | 1663<br>(European ancestry with genotypes) | 54          | 73.8 (2.8)               | 74.6 (14.1)              | 165.9 (9.3)              | 778                                 | 0.111 (0.038) | NA                                | NA            | L3              | 9800 Advantage: General Electric, Milwaukee, WI, USA                                                                                                                                                                                                                                                                                                                                 | T. Lang                                                   |  |
| Multi-Ethnic Study of Atherosclerosis (MESA)                         | USA             | 2622                                       | 53          | 62.7 (9.7)               | 80.8 (16.9)              | 169.0 (9.7)              | 736                                 | 0.107 (0.036) | NA                                | NA            | L3              | At Exam 3: Imatron C-150 (Northwestern/Chicago, UCLA, Columbia/NY); Volume Zoom (Johns Hopkins/Baltimore, Minnesota), Sensation 16 (Minnesota); Sensation Cardiac 64 (Columbia/NY); Light Speed Pro 16 (Wake Forest/Winston-Salem NC); Aquilon 32, Aquilon 64 (Johns)                                                                                                                | Image Analysis<br>Volumetric<br>Software,<br>Columbia, KY |  |
| Osteoporotic Fractures in Men (MrOS) - US                            | USA             | 5994                                       | 0           | 73.8 (5.9)               | 83.4 (13.0)              | 174.4 (6.7)              | 2650                                | 0.109 (0.039) | 2650                              | 0.178 (0.044) | L2              | GE Prospeed (Birmingham), GE Hispeed Advantage (Minneapolis), Phillips MX-8000 (Palo Alto), Seimans Somatom +4 (Pittsburgh), Phillips CT-Twin (April-July, 2000, 190 participants) and Toshiba Aquilion (December 2000-March 2002, 467 participants) (Portland), and Picker PQ-5000 (San Diego). All scans were transferred to UCSF for central quality review and image processing. | T. Lang                                                   |  |
| <b>Replication and fracture look-up cohorts</b>                      |                 |                                            |             |                          |                          |                          |                                     |               |                                   |               |                 |                                                                                                                                                                                                                                                                                                                                                                                      |                                                           |  |
| Age Gene/Environment Susceptibility-Reykjavik Study (AGES-Reykjavik) |                 |                                            |             | <i>As above</i>          |                          |                          | 2021                                |               |                                   |               |                 |                                                                                                                                                                                                                                                                                                                                                                                      |                                                           |  |
| Diabetes Heart Study                                                 | USA             | 1181                                       | 53.4        | 62.7 (9.2)               | 90.1 (19.9)              | 168.4 (9.7)              | 979                                 | 0.124 (0.040) | NA                                | NA            | L2              | GE LightSpeed Qxi and 16 Pro (Winston-Salem, NC, USA)                                                                                                                                                                                                                                                                                                                                | J. Carr                                                   |  |
| Osteoporotic Fractures in Men (MrOS) - SW                            | Sweden          | 3014                                       | 0           | 75.4 (3.2)               | 80.8 (12.1)              | 174.8 (6.5)              | NA                                  | NA            | NA                                | NA            | NA              | NA                                                                                                                                                                                                                                                                                                                                                                                   | NA                                                        |  |
| Rotterdam I                                                          | The Netherlands | 7983                                       | 57          | 67.8 (7.9)               | 73.8 (11.7)              | 167.5 (9.2)              | NA                                  | NA            | NA                                | NA            | NA              | NA                                                                                                                                                                                                                                                                                                                                                                                   | NA                                                        |  |
| Rotterdam II                                                         | The Netherlands | 3011                                       | 54.2        | 64.5 (7.8)               | 77.4 (13.2)              | 168.7 (9.2)              | NA                                  | NA            | NA                                | NA            | NA              | NA                                                                                                                                                                                                                                                                                                                                                                                   | NA                                                        |  |
| Rotterdam III                                                        | The Netherlands | 3932                                       | 57.1        | 56.8 (6.6)               | 80.6 (15.7)              | 170.7 (9.4)              | NA                                  | NA            | NA                                | NA            | NA              | NA                                                                                                                                                                                                                                                                                                                                                                                   | NA                                                        |  |
| Study of Osteoporotic Fractures                                      | USA             | 3471                                       | 100         | 71.4 (5.3)               | 67.9 (12.3)              | 159.1 (5.9)              | NA                                  | NA            | NA                                | NA            | NA              | NA                                                                                                                                                                                                                                                                                                                                                                                   | NA                                                        |  |

| Cohort                                                                                    | Morphometric vertebral fracture |               | Morphometric vertebral fracture case definition                                                                                                                                                                                         | Cohort                                                                                                                                                                                                                                                                                                                                                                | References                                                                                                                                                                                                                                                                                                                                                                                                                                                                                                                                                                                                                                                                                                                                                                                                                                                                                               | Morphometric vertebral fracture                                                                                                                                                                                                                                                                                                                                                                                                                                                                                                                                                 |     |
|-------------------------------------------------------------------------------------------|---------------------------------|---------------|-----------------------------------------------------------------------------------------------------------------------------------------------------------------------------------------------------------------------------------------|-----------------------------------------------------------------------------------------------------------------------------------------------------------------------------------------------------------------------------------------------------------------------------------------------------------------------------------------------------------------------|----------------------------------------------------------------------------------------------------------------------------------------------------------------------------------------------------------------------------------------------------------------------------------------------------------------------------------------------------------------------------------------------------------------------------------------------------------------------------------------------------------------------------------------------------------------------------------------------------------------------------------------------------------------------------------------------------------------------------------------------------------------------------------------------------------------------------------------------------------------------------------------------------------|---------------------------------------------------------------------------------------------------------------------------------------------------------------------------------------------------------------------------------------------------------------------------------------------------------------------------------------------------------------------------------------------------------------------------------------------------------------------------------------------------------------------------------------------------------------------------------|-----|
|                                                                                           | Cases (n)                       | Non-Cases (n) |                                                                                                                                                                                                                                         |                                                                                                                                                                                                                                                                                                                                                                       |                                                                                                                                                                                                                                                                                                                                                                                                                                                                                                                                                                                                                                                                                                                                                                                                                                                                                                          |                                                                                                                                                                                                                                                                                                                                                                                                                                                                                                                                                                                 | QCT |
| <b>Discovery cohorts</b>                                                                  |                                 |               |                                                                                                                                                                                                                                         |                                                                                                                                                                                                                                                                                                                                                                       |                                                                                                                                                                                                                                                                                                                                                                                                                                                                                                                                                                                                                                                                                                                                                                                                                                                                                                          |                                                                                                                                                                                                                                                                                                                                                                                                                                                                                                                                                                                 |     |
| Age Gene/Environment Susceptibility-Reykjavik Study (AGES-Reykjavik)                      | NA                              | NA            | NA                                                                                                                                                                                                                                      | [PMID:17351290] Harris, T. B., Launer, L. J., Eiriksdottir, G., Kjartansson, O., Jonsson, P. V., Sigurdsson, G., et al. (2007). Age, Gene/Environment Susceptibility-Reykjavik Study: multidisciplinary applied phenomics. <i>Am J Epidemiol</i> , 165(9), 1076-1087. <a href="http://doi.org/10.1093/aje/kwk115">http://doi.org/10.1093/aje/kwk115</a>               | NA                                                                                                                                                                                                                                                                                                                                                                                                                                                                                                                                                                                                                                                                                                                                                                                                                                                                                                       |                                                                                                                                                                                                                                                                                                                                                                                                                                                                                                                                                                                 |     |
| Family Heart Study                                                                        | NA                              | NA            | NA                                                                                                                                                                                                                                      | [PMID: 8651220] Higgins M, Province M, Heiss G, Eckfeldt J, Ellison RC, Folsom AR, Rao DC, Sprafka JM, Williams R. NHLBI Family Heart Study: objectives and design. <i>Am J Epidemiol</i> 1996;143(12):1219-28                                                                                                                                                        | NA                                                                                                                                                                                                                                                                                                                                                                                                                                                                                                                                                                                                                                                                                                                                                                                                                                                                                                       |                                                                                                                                                                                                                                                                                                                                                                                                                                                                                                                                                                                 |     |
| Framingham Osteoporosis Study                                                             | 430                             | 2375          | Lateral radiographs or QCT lateral scout views at 13 vertebral levels (T4 to L4) using Genant's semiquantitative (SQ) scale (grades 0 to 3). Vertebral fracture was defined as having at least 25% reduction in height of any vertebra. | [PMID: 1615761] Hannan, MT, et al. Bone mineral density in elderly men and women: results from the Framingham osteoporosis study. <i>J Bone Miner Res</i> 1992;7(5):547-53                                                                                                                                                                                            | [PMID: 20495902] Samelson EJ, Christiansen BA, Demissie S, Broe KE, Zhou Y, Meng CA, Yu W, Cheng X, O'Donnell CJ, Hoffmann U, Genant HK, Kiel DP, Bouxsein ML 2011 Reliability of vertebral fracture assessment using multidetector CT lateral scout views: the Framingham Osteoporosis Study. <i>Osteoporos Int</i> 22(4):1123-31. [PMID: 15956133] Moselewski et al. Calcium concentration of individual coronary calcified plaques as measured by multidetector row computed tomography. <i>Circulation</i> 111(24):3236-41. [PMID: 18940279] Hoffmann et al. Defining Normal Distributions of Coronary Artery Calcium in Women and Men (from the Framingham Heart Study). <i>Am J Cardiol</i> 102(9):1136-41.                                                                                                                                                                                        | [PMID: 16869718] Samelson EJ, Hannan MT, Zhang Y, Genant HK, Felson DT, Kiel DP. Incidence and risk factors for vertebral fracture in women and men: 25-year follow-up results from the population-based Framingham study. <i>J Bone Miner Res</i> 2006;21:1207-14. [PMID: 2222934] Liu CT, Karasik D, Zhou Y, Hsu YH, Genant HK, Broe KE, et al. Heritability of prevalent vertebral fracture and volumetric bone mineral density and geometry at the lumbar spine in three generations of the Framingham study. <i>J Bone Miner Res</i> . 2012;27(4):954-8. PMID: PMC3375687. |     |
| Health, Aging, and Body Composition (Health ABC)                                          | NA                              | NA            | NA                                                                                                                                                                                                                                      | [PMID: 10865790] Harris, TB, Visser M, Everhart J, Cauley J, Tyllavsky F, Fuerst T, Zamboni M, Taaffe D, Resnick HE, Scherzinger A, Nevitt M. Waist circumference and sagittal diameter reflect total body fat better than visceral fat in older men and women. <i>The Health, Aging and Body Composition Study</i> . <i>Ann N Y Acad Sci</i> . 2000 May;904:462-473. | [PMID: 17708713] Mackey DC, Eby JG, Harris F, Taaffe DR, Cauley JA, Tyllavsky FA, Harris TB, Lang TF, Cummings SR, Health, Aging, and Body Composition Group. Prediction of clinical non-spine fractures in older black and white men and women with volumetric BMD of the spine and areal BMD of the hip: the Health, Aging, and Body Composition Study. <i>J Bone Miner Res</i> . 2007 Dec;22(12):1863-1868.                                                                                                                                                                                                                                                                                                                                                                                                                                                                                           | NA                                                                                                                                                                                                                                                                                                                                                                                                                                                                                                                                                                              |     |
| Multi-Ethnic Study of Atherosclerosis (MESA)                                              | NA                              | NA            | NA                                                                                                                                                                                                                                      | [PMID: 12397006] Bild DE, Bluemke DA, Burke GL, Detrano R, Diez Roux AV, Folsom AR, Greenland P, Jacob DR, Jr., Kronmal R, Liu K, Nelson JC, O'Leary D, Saad MF, Shea S, Szklo M, Tracy RP. Multi-ethnic study of atherosclerosis: objectives and design. <i>Am J Epidemiol</i> . 2002;156(9):871-881.                                                                | [PMID: 19819456] Hyder JA, Allison MA, Barrett-Connor E, Detrano R, Wong ND, Sirlin C, Gapstur SM, Ouyang P, Carr JJ, Criqui MH. Bone mineral density and atherosclerosis: The Multi-Ethnic Study of Atherosclerosis, Abdominal Aortic Calcium Study. <i>Atherosclerosis</i> . 2010;209(1):283-289. [PMID: 23570937] Li D, Mao SS, Khazai B, Hyder JA, Allison M, McClelland R, de Boer I, Carr JJ, Criqui MH, Gao Y, Budoff MJ. Noncontrast Cardiac Computed Tomography Image-Based Vertebral Bone Mineral Density: The Multi-Ethnic Study of Atherosclerosis (MESA). <i>Acad Radiol</i> . 2013;20(5):621-627. [PMID: 25976951] van Ballegoijen AJ, Robinson-Cohen C, Katz R, Criqui M, Budoff M, Li D, Siscovick D, Hoffnagel A, Shea SJ, Burke G, de Boer IJ, Kestenbaum B. Vitamin D metabolites and bone mineral density: The multi-ethnic study of atherosclerosis. <i>Bone</i> . 2015;78:186-193. | NA                                                                                                                                                                                                                                                                                                                                                                                                                                                                                                                                                                              |     |
| Osteoporotic Fractures in Men (683)                                                       |                                 | 3871          | Any incident clinical vertebral fracture or prevalent morphometric fx (SQ grade of ≥ 1 at visit 1 or 2) or incident morphometric fx (a change in SQ between visits 1 and 2 of at least 1)                                               | [PMID: 16084776] Orwoll, E., et al. Design and baseline characteristics of the osteoporotic fractures in men (MROS) study -- a large observational study of the determinants of fracture in older men. <i>Contemp Clin Trials</i> . 2005 Oct;26 (5):569-85.                                                                                                           | [PMID: 16869717] Marshall LM, Lang TF, Lambert LC, Zmuda JM, Ensrud KE, Orwoll ES. Dimensions and volumetric BMD of the proximal femur and their relation to age among older U.S. men. <i>J Bone Miner Res</i> 2006; 21:1197-1206. [PMID: 9213015] Lang TF, Keyak JH, Heitz MW, Augat P, Lu Y, Mathur A, Genant HK. Volumetric quantitative computed tomography of the proximal femur: precision and relation to bone strength. <i>Bone</i> 1997; 21:101-118. [PMID: 10050823] Lang TF, Li J, Harris ST, Genant HK. Assessment of vertebral bone mineral density using volumetric quantitative CT. <i>J Computer Assist Tomogr</i> 1999; 23:130-137.                                                                                                                                                                                                                                                     | [PMID: 25003811] Cawthon PM, et al. 2014 Methods and reliability of radiographic vertebral fracture detection in older men <i>Bone</i> 67:152-5.                                                                                                                                                                                                                                                                                                                                                                                                                                |     |
| <b>Replication and fracture look-up cohorts</b>                                           |                                 |               |                                                                                                                                                                                                                                         |                                                                                                                                                                                                                                                                                                                                                                       |                                                                                                                                                                                                                                                                                                                                                                                                                                                                                                                                                                                                                                                                                                                                                                                                                                                                                                          |                                                                                                                                                                                                                                                                                                                                                                                                                                                                                                                                                                                 |     |
| Age Gene/Environment Susceptibility-Reykjavik Study (AGES-Reykjavik) Diabetes Heart Study | NA                              | NA            | NA                                                                                                                                                                                                                                      |                                                                                                                                                                                                                                                                                                                                                                       |                                                                                                                                                                                                                                                                                                                                                                                                                                                                                                                                                                                                                                                                                                                                                                                                                                                                                                          | NA                                                                                                                                                                                                                                                                                                                                                                                                                                                                                                                                                                              |     |
| Osteoporotic Fractures in Men (MROS) - SW                                                 | 215                             | 1131          | A prevalent vertebral fracture was considered if visual inspection indicated a reduction in vertebral height and/or compression of 10% or above of the estimated vertebral body height.                                                 | [PMID: 16598372 ] Mellström, D. et al. Free testosterone is an independent predictor of BMD and prevalent fractures in elderly men: MROS Sweden. <i>J Bone Miner Res</i> . 2206;21(4):529-535.                                                                                                                                                                        | NA                                                                                                                                                                                                                                                                                                                                                                                                                                                                                                                                                                                                                                                                                                                                                                                                                                                                                                       | [PMID: 25264314 ] Kherad, M. et al. Low clinical relevance of a prevalent vertebral fracture in elderly men - the MROS Sweden study. <i>Spine J</i> . 2015;15(2):281-289.                                                                                                                                                                                                                                                                                                                                                                                                       |     |
| Rotterdam I                                                                               | 1168                            | 4098          | Prevalent and incident vertebral deformities of grade 1 or more read with SpineAnalyzer morphometric software at visit 1                                                                                                                | [PMID: 26386597 ] Hofman, Albert et al. The Rotterdam Study: 2016 Objectives and Design Update. <i>European Journal of Epidemiology</i> 30.8 (2015): 661-708.                                                                                                                                                                                                         | NA                                                                                                                                                                                                                                                                                                                                                                                                                                                                                                                                                                                                                                                                                                                                                                                                                                                                                                       | [PMID: 22892721] Oei L, Rivadeneira F, Ly F, et al. Review of radiological scoring methods of osteoporotic vertebral fractures for clinical and research settings. <i>Eur Radiol</i> . 2013;23:476-86.                                                                                                                                                                                                                                                                                                                                                                          |     |
| Rotterdam II                                                                              | 407                             | 1545          |                                                                                                                                                                                                                                         |                                                                                                                                                                                                                                                                                                                                                                       | NA                                                                                                                                                                                                                                                                                                                                                                                                                                                                                                                                                                                                                                                                                                                                                                                                                                                                                                       |                                                                                                                                                                                                                                                                                                                                                                                                                                                                                                                                                                                 |     |
| Rotterdam III                                                                             | 503                             | 1815          | Prevalent vertebral deformities of grade 1 or more read with SpineAnalyzer morphometric software at visit 1                                                                                                                             |                                                                                                                                                                                                                                                                                                                                                                       | NA                                                                                                                                                                                                                                                                                                                                                                                                                                                                                                                                                                                                                                                                                                                                                                                                                                                                                                       |                                                                                                                                                                                                                                                                                                                                                                                                                                                                                                                                                                                 |     |
| Study of Osteoporotic Fractures                                                           | 978                             | 2493          | Prevalent vert fx 3SD rule                                                                                                                                                                                                              | Black DM, Palermo L, Nevitt MC, Genant HK, Epstein R, San Valenti NA                                                                                                                                                                                                                                                                                                  |                                                                                                                                                                                                                                                                                                                                                                                                                                                                                                                                                                                                                                                                                                                                                                                                                                                                                                          |                                                                                                                                                                                                                                                                                                                                                                                                                                                                                                                                                                                 |     |
